# Supplementary material for: Tetramer formation in Arabidopsis MADS domain proteins: analysis of a protein-protein interaction network
Source: PubMed Central journal article supplement (PMC3913338; doi:10.1186/1752-0509-8-9), 2014-01-27
Supplement: 1752-0509-8-9-S1.pdf [file 1752-0509-8-9-S1.pdf]

**Table S1: Interactions between MADS domain proteins in *A. thaliana***

| Interaction       | References                                                                                                           |
|-------------------|----------------------------------------------------------------------------------------------------------------------|
| <i>SEP1 AG</i>    | de Folter et al. (2005); Fan et al. (1997)                                                                           |
| <i>SEP1 SHP1</i>  | de Folter et al. (2005); Immink et al. (2009) <sup>T</sup>                                                           |
| <i>SEP2 AG</i>    | de Folter et al. (2005); Fan et al. (1997)                                                                           |
| <i>SHP2 SEP1</i>  | de Folter et al. (2005); Immink et al. (2009) <sup>T</sup>                                                           |
| <i>AGL6 AG</i>    | Immink et al. (2009) <sup>T</sup> ; Fan et al. (1997)                                                                |
| <i>AGL6 SEP1</i>  | de Folter et al. (2005)                                                                                              |
| <i>AGL6 SHP2</i>  | de Folter et al. (2005)                                                                                              |
| <i>AP1 SEP1</i>   | de Folter et al. (2005); Immink et al. (2009) <sup>T</sup>                                                           |
| <i>AP1 AGL6</i>   | de Folter et al. (2005)                                                                                              |
| <i>FUL AG</i>     | de Folter et al. (2005)                                                                                              |
| <i>FUL SEP1</i>   | de Folter et al. (2005)                                                                                              |
| <i>FUL AGL6</i>   | de Folter et al. (2005)                                                                                              |
| <i>SEP3 AG</i>    | de Folter et al. (2005); Immink et al. (2009) <sup>T</sup> ; Favaro et al. (2003) <sup>D,T</sup> ; Fan et al. (1997) |
| <i>SEP3 SHP1</i>  | de Folter et al. (2005); Immink et al. (2009) <sup>T</sup> ; Favaro et al. (2003) <sup>D,T</sup>                     |
| <i>SEP3 SEP1</i>  | Immink et al. (2009) <sup>T</sup>                                                                                    |
| <i>SEP3 SHP2</i>  | de Folter et al. (2005); Immink et al. (2009) <sup>T</sup> ; Favaro et al. (2003) <sup>D,T</sup>                     |
| <i>SEP3 AGL6</i>  | de Folter et al. (2005)                                                                                              |
| <i>SEP3 AP1</i>   | de Folter et al. (2005); Immink et al. (2009) <sup>T</sup> ; Pelaz et al. (2001)                                     |
| <i>SEP3 FUL</i>   | de Folter et al. (2005); Immink et al. (2009) <sup>T</sup>                                                           |
| <i>SEP3 SEP3</i>  | Melzer et al. (2009)                                                                                                 |
| <i>CAL SEP3</i>   | Pelaz et al. (2001)                                                                                                  |
| <i>STK SEP1</i>   | de Folter et al. (2005)                                                                                              |
| <i>STK SEP3</i>   | de Folter et al. (2005); Immink et al. (2009) <sup>T</sup> ; Favaro et al. (2003) <sup>D,T</sup>                     |
| <i>AGL12 SEP1</i> | de Folter et al. (2005)                                                                                              |
| <i>AGL13 AG</i>   | de Folter et al. (2005)                                                                                              |
| <i>AGL13 SHP1</i> | de Folter et al. (2005)                                                                                              |
| <i>AGL14 AG</i>   | Immink et al. (2009) <sup>T</sup>                                                                                    |
| <i>AGL14 SHP1</i> | Immink et al. (2009) <sup>T</sup>                                                                                    |
| <i>AGL14 SHP2</i> | Immink et al. (2009) <sup>T</sup>                                                                                    |
| <i>AGL14 FUL</i>  | de Folter et al. (2005)                                                                                              |
| <i>AGL14 SEP3</i> | Immink et al. (2009) <sup>T</sup>                                                                                    |
| <i>AGL15 AG</i>   | de Folter et al. (2005)                                                                                              |
| <i>AGL15 SHP1</i> | de Folter et al. (2005)                                                                                              |
| <i>AGL15 SHP2</i> | de Folter et al. (2005)                                                                                              |
| <i>AGL15 AGL6</i> | de Folter et al. (2005)                                                                                              |
| <i>AGL15 AP1</i>  | de Folter et al. (2005); Immink et al. (2009) <sup>T</sup>                                                           |

Table S1 – continued from previous page

| Interaction        | References                                                                       |
|--------------------|----------------------------------------------------------------------------------|
| <i>AGL15 STK</i>   | de Folter et al. (2005); Immink et al. (2009) <sup>T</sup>                       |
| <i>AGL15 AGL15</i> | de Folter et al. (2005)                                                          |
| <i>AGL16 AG</i>    | de Folter et al. (2005)                                                          |
| <i>AGL16 SHP1</i>  | de Folter et al. (2005)                                                          |
| <i>AGL16 SEP1</i>  | de Folter et al. (2005)                                                          |
| <i>AGL16 SEP2</i>  | de Folter et al. (2005)                                                          |
| <i>AGL16 SHP2</i>  | de Folter et al. (2005)                                                          |
| <i>AGL16 AGL6</i>  | de Folter et al. (2005)                                                          |
| <i>AGL16 API</i>   | de Folter et al. (2005)                                                          |
| <i>AGL16 SEP3</i>  | de Folter et al. (2005); Immink et al. (2009) <sup>T</sup>                       |
| <i>AGL16 STK</i>   | de Folter et al. (2005)                                                          |
| <i>AGL16 AGL12</i> | de Folter et al. (2005)                                                          |
| <i>AGL16 AGL14</i> | de Folter et al. (2005)                                                          |
| <i>AGL16 AGL15</i> | de Folter et al. (2005)                                                          |
| <i>AGL16 AGL16</i> | de Folter et al. (2005)                                                          |
| <i>AGL17 AGL16</i> | de Folter et al. (2005)                                                          |
| <i>AGL19 AGL17</i> | Immink et al. (2009) <sup>T</sup>                                                |
| <i>SOC1 SHP1</i>   | de Folter et al. (2005)                                                          |
| <i>SOC1 SEP1</i>   | de Folter et al. (2005); Immink et al. (2009) <sup>T</sup>                       |
| <i>SOC1 SEP4</i>   | de Folter et al. (2005)                                                          |
| <i>SOC1 SEP2</i>   | de Folter et al. (2005); Immink et al. (2009) <sup>T</sup>                       |
| <i>SOC1 SHP2</i>   | de Folter et al. (2005)                                                          |
| <i>SOC1 AGL6</i>   | de Folter et al. (2005); Immink et al. (2009) <sup>T</sup>                       |
| <i>SOC1 API</i>    | de Folter et al. (2005); Immink et al. (2009) <sup>T</sup> ; Pelaz et al. (2001) |
| <i>SOC1 FUL</i>    | de Folter et al. (2005); Immink et al. (2009) <sup>T</sup>                       |
| <i>SOC1 SEP3</i>   | de Folter et al. (2005); Immink et al. (2009) <sup>T</sup>                       |
| <i>SOC1 CAL</i>    | de Folter et al. (2005); Pelaz et al. (2001)                                     |
| <i>SOC1 AGL12</i>  | de Folter et al. (2005)                                                          |
| <i>SOC1 AGL13</i>  | de Folter et al. (2005)                                                          |
| <i>SOC1 AGL14</i>  | de Folter et al. (2005); Immink et al. (2009) <sup>T</sup>                       |
| <i>SOC1 AGL15</i>  | de Folter et al. (2005)                                                          |
| <i>SOC1 AGL16</i>  | de Folter et al. (2005)                                                          |
| <i>SOC1 AGL17</i>  | de Folter et al. (2005); Immink et al. (2009) <sup>T</sup>                       |
| <i>SOC1 AGL19</i>  | de Folter et al. (2005); Immink et al. (2009) <sup>T</sup>                       |
| <i>SOC1 SOC1</i>   | de Folter et al. (2005)                                                          |
| <i>AGL21 AG</i>    | de Folter et al. (2005)                                                          |
| <i>AGL21 SHP1</i>  | de Folter et al. (2005)                                                          |
| <i>AGL21 SEP1</i>  | de Folter et al. (2005)                                                          |
| <i>AGL21 SEP2</i>  | de Folter et al. (2005)                                                          |
| <i>AGL21 SHP2</i>  | de Folter et al. (2005)                                                          |

Table S1 – continued from previous page

| Interaction        | References                                                                       |
|--------------------|----------------------------------------------------------------------------------|
| <i>AGL21 AGL6</i>  | de Folter et al. (2005)                                                          |
| <i>AGL21 API</i>   | de Folter et al. (2005)                                                          |
| <i>AGL21 FUL</i>   | de Folter et al. (2005)                                                          |
| <i>AGL21 SEP3</i>  | Immink et al. (2009) <sup>T</sup>                                                |
| <i>AGL21 STK</i>   | de Folter et al. (2005)                                                          |
| <i>AGL21 AGL12</i> | de Folter et al. (2005)                                                          |
| <i>AGL21 AGL13</i> | de Folter et al. (2005)                                                          |
| <i>AGL21 AGL15</i> | de Folter et al. (2005)                                                          |
| <i>AGL21 AGL16</i> | de Folter et al. (2005)                                                          |
| <i>AGL21 AGL17</i> | de Folter et al. (2005)                                                          |
| <i>AGL21 AGL19</i> | de Folter et al. (2005)                                                          |
| <i>AGL21 SOC1</i>  | de Folter et al. (2005); Immink et al. (2009) <sup>T</sup>                       |
| <i>AGL21 AGL21</i> | de Folter et al. (2005)                                                          |
| <i>SVP SEP1</i>    | de Folter et al. (2005)                                                          |
| <i>SVP AGL6</i>    | de Folter et al. (2005)                                                          |
| <i>SVP API</i>     | de Folter et al. (2005); Pelaz et al. (2001)                                     |
| <i>SVP SEP3</i>    | de Folter et al. (2005); Immink et al. (2009) <sup>T</sup>                       |
| <i>SVP CAL</i>     | Pelaz et al. (2001)                                                              |
| <i>SVP AGL15</i>   | de Folter et al. (2005)                                                          |
| <i>SVP SOC1</i>    | de Folter et al. (2005)                                                          |
| <i>SVP AGL21</i>   | de Folter et al. (2005)                                                          |
| <i>AGL24 AG</i>    | de Folter et al. (2005)                                                          |
| <i>AGL24 SHP1</i>  | de Folter et al. (2005)                                                          |
| <i>AGL24 SEP1</i>  | de Folter et al. (2005); Immink et al. (2009) <sup>T</sup>                       |
| <i>AGL24 AGL6</i>  | de Folter et al. (2005)                                                          |
| <i>AGL24 API</i>   | de Folter et al. (2005); Immink et al. (2009) <sup>T</sup> ; Pelaz et al. (2001) |
| <i>AGL24 FUL</i>   | de Folter et al. (2005); Immink et al. (2009) <sup>T</sup>                       |
| <i>AGL24 SEP3</i>  | de Folter et al. (2005); Immink et al. (2009) <sup>T</sup>                       |
| <i>AGL24 CAL</i>   | Pelaz et al. (2001)                                                              |
| <i>AGL24 AGL14</i> | de Folter et al. (2005)                                                          |
| <i>AGL24 AGL15</i> | de Folter et al. (2005)                                                          |
| <i>AGL24 AGL16</i> | de Folter et al. (2005)                                                          |
| <i>AGL24 SOC1</i>  | de Folter et al. (2005); Immink et al. (2009) <sup>T</sup>                       |
| <i>AGL24 AGL21</i> | de Folter et al. (2005)                                                          |
| <i>AGL24 AGL24</i> | de Folter et al. (2005)                                                          |
| <i>FLM API</i>     | Pelaz et al. (2001)                                                              |
| <i>ABS SEP1</i>    | de Folter et al. (2005); Immink et al. (2009) <sup>T</sup>                       |
| <i>ABS SEP2</i>    | de Folter et al. (2005); Immink et al. (2009) <sup>T</sup>                       |
| <i>ABS SEP3</i>    | de Folter et al. (2005); Immink et al. (2009) <sup>T</sup>                       |
| <i>AGL36 AGL28</i> | de Folter et al. (2005)                                                          |

Table S1 – continued from previous page

| Interaction        | References                                                 |
|--------------------|------------------------------------------------------------|
| <i>PHE1 AGL28</i>  | de Folter et al. (2005)                                    |
| <i>PHE2 AGL28</i>  | de Folter et al. (2005)                                    |
| <i>AGL39 AG</i>    | de Folter et al. (2005)                                    |
| <i>AGL39 AGL6</i>  | de Folter et al. (2005)                                    |
| <i>AGL39 AP1</i>   | de Folter et al. (2005)                                    |
| <i>AGL39 FLM</i>   | de Folter et al. (2005)                                    |
| <i>AGL39 PHE1</i>  | de Folter et al. (2005)                                    |
| <i>AGL40 PHE1</i>  | de Folter et al. (2005)                                    |
| <i>AGL40 PHE2</i>  | de Folter et al. (2005)                                    |
| <i>AGL42 SEP1</i>  | de Folter et al. (2005)                                    |
| <i>AGL42 AGL6</i>  | de Folter et al. (2005)                                    |
| <i>AGL42 AGL16</i> | de Folter et al. (2005)                                    |
| <i>AGL42 SOC1</i>  | de Folter et al. (2005); Immink et al. (2009) <sup>T</sup> |
| <i>AGL42 AGL21</i> | de Folter et al. (2005)                                    |
| <i>ANR1 SEP3</i>   | Immink et al. (2009) <sup>T</sup>                          |
| <i>ANR1 AGL16</i>  | de Folter et al. (2005)                                    |
| <i>ANR1 SOC1</i>   | de Folter et al. (2005)                                    |
| <i>ANR1 AGL21</i>  | de Folter et al. (2005)                                    |
| <i>AGL45 AGL40</i> | de Folter et al. (2005)                                    |
| <i>AGL49 AGL39</i> | de Folter et al. (2005)                                    |
| <i>AGL52 AGL39</i> | de Folter et al. (2005)                                    |
| <i>AGL53 AGL6</i>  | de Folter et al. (2005)                                    |
| <i>AGL53 AGL16</i> | de Folter et al. (2005)                                    |
| <i>AGL55 AGL52</i> | de Folter et al. (2005)                                    |
| <i>AGL56 AGL52</i> | de Folter et al. (2005)                                    |
| <i>AGL62 AGL36</i> | de Folter et al. (2005)                                    |
| <i>AGL62 PHE1</i>  | de Folter et al. (2005)                                    |
| <i>AGL62 PHE2</i>  | de Folter et al. (2005)                                    |
| <i>AGL63 AGL16</i> | de Folter et al. (2005)                                    |
| <i>AGL64 AGL48</i> | de Folter et al. (2005)                                    |
| <i>AGL66 AGL6</i>  | de Folter et al. (2005)                                    |
| <i>AGL66 AGL65</i> | de Folter et al. (2005); Immink et al. (2009) <sup>T</sup> |
| <i>AGL71 SEP1</i>  | de Folter et al. (2005)                                    |
| <i>AGL71 SOC1</i>  | de Folter et al. (2005)                                    |
| <i>AGL73 AGL26</i> | de Folter et al. (2005); Immink et al. (2009) <sup>T</sup> |
| <i>AGL73 AGL43</i> | de Folter et al. (2005)                                    |
| <i>AGL73 AGL52</i> | de Folter et al. (2005)                                    |
| <i>AGL73 AGL53</i> | de Folter et al. (2005)                                    |
| <i>AGL77 AGL39</i> | de Folter et al. (2005)                                    |
| <i>AGL77 AGL64</i> | de Folter et al. (2005)                                    |

Table S1 – continued from previous page

| Interaction        | References                                                 |
|--------------------|------------------------------------------------------------|
| <i>AGL77 AGL73</i> | de Folter et al. (2005)                                    |
| <i>AGL78 AGL6</i>  | de Folter et al. (2005)                                    |
| <i>AGL78 AGL39</i> | de Folter et al. (2005)                                    |
| <i>AGL78 AGL55</i> | de Folter et al. (2005); Immink et al. (2009) <sup>T</sup> |
| <i>AGL78 AGL56</i> | de Folter et al. (2005)                                    |
| <i>AGL78 AGL73</i> | de Folter et al. (2005)                                    |
| <i>AGL78 AGL77</i> | de Folter et al. (2005)                                    |
| <i>AGL80 AGL26</i> | Immink et al. (2009) <sup>T</sup>                          |
| <i>AGL80 AGL62</i> | de Folter et al. (2005)                                    |
| <i>AGL82 AGL39</i> | de Folter et al. (2005)                                    |
| <i>AGL82 AGL66</i> | de Folter et al. (2005)                                    |
| <i>AGL83 AGL53</i> | de Folter et al. (2005)                                    |
| <i>AGL83 AGL54</i> | de Folter et al. (2005)                                    |
| <i>AGL84 AGL26</i> | de Folter et al. (2005)                                    |
| <i>AGL84 AGL43</i> | de Folter et al. (2005)                                    |
| <i>AGL84 AGL52</i> | de Folter et al. (2005); Immink et al. (2009) <sup>T</sup> |
| <i>AGL84 AGL53</i> | de Folter et al. (2005)                                    |
| <i>AGL84 AGL76</i> | de Folter et al. (2005)                                    |
| <i>AGL84 AGL77</i> | de Folter et al. (2005)                                    |
| <i>AGL84 AGL78</i> | de Folter et al. (2005)                                    |
| <i>AGL84 AGL79</i> | Immink et al. (2009) <sup>T</sup>                          |
| <i>AGL86 AGL6</i>  | de Folter et al. (2005); Immink et al. (2009) <sup>T</sup> |
| <i>AGL86 AP1</i>   | de Folter et al. (2005)                                    |
| <i>AGL86 AGL23</i> | de Folter et al. (2005)                                    |
| <i>AGL86 AGL28</i> | de Folter et al. (2005)                                    |
| <i>AGL86 AGL40</i> | de Folter et al. (2005)                                    |
| <i>AGL86 AGL62</i> | de Folter et al. (2005)                                    |
| <i>AGL86 AGL65</i> | de Folter et al. (2005)                                    |
| <i>AGL86 AGL82</i> | de Folter et al. (2005)                                    |
| <i>AGL89 AGL73</i> | de Folter et al. (2005)                                    |
| <i>AGL89 AGL84</i> | de Folter et al. (2005)                                    |
| <i>AGL90 AGL40</i> | de Folter et al. (2005)                                    |
| <i>AGL90 AGL62</i> | de Folter et al. (2005)                                    |
| <i>AGL90 AGL66</i> | de Folter et al. (2005)                                    |
| <i>AGL90 AGL86</i> | de Folter et al. (2005)                                    |
| <i>AGL92 AGL6</i>  | de Folter et al. (2005)                                    |
| <i>AGL92 AP1</i>   | de Folter et al. (2005)                                    |
| <i>AGL92 AGL23</i> | de Folter et al. (2005)                                    |
| <i>AGL92 AGL40</i> | Immink et al. (2009) <sup>T</sup>                          |
| <i>AGL92 AGL62</i> | de Folter et al. (2005); Immink et al. (2009) <sup>T</sup> |

Table S1 – continued from previous page

| Interaction         | References                                                 |
|---------------------|------------------------------------------------------------|
| <i>AGL92 AGL78</i>  | de Folter et al. (2005); Immink et al. (2009) <sup>T</sup> |
| <i>AGL92 AGL90</i>  | de Folter et al. (2005)                                    |
| <i>AGL96 AGL66</i>  | de Folter et al. (2005)                                    |
| <i>AGL97 AG</i>     | de Folter et al. (2005)                                    |
| <i>AGL97 AGL6</i>   | de Folter et al. (2005)                                    |
| <i>AGL97 AP1</i>    | de Folter et al. (2005)                                    |
| <i>AGL97 AGL26</i>  | de Folter et al. (2005)                                    |
| <i>AGL97 FLM</i>    | de Folter et al. (2005)                                    |
| <i>AGL97 PHE1</i>   | de Folter et al. (2005)                                    |
| <i>AGL97 PHE2</i>   | Immink et al. (2009) <sup>D</sup>                          |
| <i>AGL97 AGL43</i>  | de Folter et al. (2005)                                    |
| <i>AGL97 AGL52</i>  | de Folter et al. (2005)                                    |
| <i>AGL97 AGL53</i>  | de Folter et al. (2005)                                    |
| <i>AGL97 AGL62</i>  | de Folter et al. (2005)                                    |
| <i>AGL97 AGL65</i>  | de Folter et al. (2005)                                    |
| <i>AGL97 AGL76</i>  | de Folter et al. (2005)                                    |
| <i>AGL97 AGL77</i>  | de Folter et al. (2005)                                    |
| <i>AGL97 AGL78</i>  | de Folter et al. (2005)                                    |
| <i>AGL97 AGL79</i>  | Immink et al. (2009) <sup>D</sup>                          |
| <i>AGL97 AGL82</i>  | de Folter et al. (2005)                                    |
| <i>AGL97 AGL87</i>  | de Folter et al. (2005)                                    |
| <i>AGL97 AGL89</i>  | de Folter et al. (2005)                                    |
| <i>AGL97 AGL90</i>  | de Folter et al. (2005)                                    |
| <i>AGL98 SOC1</i>   | Immink et al. (2009) <sup>D</sup>                          |
| <i>AGL99 PHE1</i>   | de Folter et al. (2005)                                    |
| <i>AGL99 PHE2</i>   | Immink et al. (2009) <sup>D</sup>                          |
| <i>AGL99 AGL43</i>  | de Folter et al. (2005)                                    |
| <i>AGL99 AGL52</i>  | de Folter et al. (2005)                                    |
| <i>AGL99 AGL76</i>  | de Folter et al. (2005)                                    |
| <i>AGL99 AGL77</i>  | de Folter et al. (2005)                                    |
| <i>AGL99 AGL78</i>  | de Folter et al. (2005); Immink et al. (2009) <sup>T</sup> |
| <i>AGL99 AGL79</i>  | Immink et al. (2009) <sup>D</sup>                          |
| <i>AGL99 AGL82</i>  | de Folter et al. (2005)                                    |
| <i>AGL101 AGL55</i> | Immink et al. (2009) <sup>T</sup>                          |
| <i>AGL101 AGL56</i> | Immink et al. (2009) <sup>T</sup>                          |
| <i>AGL101 AGL73</i> | de Folter et al. (2005)                                    |
| <i>AGL101 AGL84</i> | de Folter et al. (2005); Immink et al. (2009) <sup>T</sup> |
| <i>AGL101 AGL97</i> | de Folter et al. (2005)                                    |
| <i>AGL101 AGL99</i> | Immink et al. (2009) <sup>T</sup>                          |
| <i>AGL102 AGL78</i> | de Folter et al. (2005)                                    |

Table S1 – continued from previous page

| Interaction           | References                                                             |
|-----------------------|------------------------------------------------------------------------|
| <i>AGL102 AGL82</i>   | de Folter et al. (2005)                                                |
| <i>AGL102 AGL97</i>   | Immink et al. (2009) <sup>D</sup>                                      |
| <i>AGL102 AGL99</i>   | Immink et al. (2009) <sup>D</sup>                                      |
| <i>AGL102 AGL101</i>  | Immink et al. (2009) <sup>T</sup>                                      |
| <i>AGL103 AGL39</i>   | de Folter et al. (2005); Immink et al. (2009) <sup>T</sup>             |
| <i>AGL103 AGL40</i>   | Immink et al. (2009) <sup>T</sup>                                      |
| <i>AGL103 AGL55</i>   | de Folter et al. (2005); Immink et al. (2009) <sup>T</sup>             |
| <i>AGL103 AGL56</i>   | de Folter et al. (2005); Immink et al. (2009) <sup>T</sup>             |
| <i>AGL103 AGL92</i>   | de Folter et al. (2005); Immink et al. (2009) <sup>T</sup>             |
| <i>AGL103 AGL97</i>   | de Folter et al. (2005)                                                |
| <i>AGL103 AGL99</i>   | de Folter et al. (2005); Immink et al. (2009) <sup>T</sup>             |
| <i>AGL103 AGL101</i>  | Immink et al. (2009) <sup>T</sup>                                      |
| <i>AGL103 AGL102</i>  | de Folter et al. (2005); Immink et al. (2009) <sup>T</sup>             |
| <i>AGL104 AGL65</i>   | de Folter et al. (2005); Immink et al. (2009) <sup>T</sup>             |
| <i>AGL104 AGL97</i>   | de Folter et al. (2005)                                                |
| <i>PI AP1</i>         | Honma and Goto (2001) <sup>T</sup>                                     |
| <i>PI SEP3</i>        | Immink et al. (2009) <sup>T</sup> ; Honma and Goto (2001) <sup>T</sup> |
| <i>PI AP3</i>         | Immink et al. (2009) <sup>T</sup> ; Honma and Goto (2001) <sup>T</sup> |
| <i>ABS-2 SEP1</i>     | de Folter et al. (2005); Immink et al. (2009) <sup>T</sup>             |
| <i>ABS-2 SEP2</i>     | Immink et al. (2009) <sup>T</sup>                                      |
| <i>ABS-2 SEP3</i>     | de Folter et al. (2005); Immink et al. (2009) <sup>T</sup>             |
| <i>ABS-2 AGL14</i>    | Immink et al. (2009) <sup>T</sup>                                      |
| <i>ABS-2 AGL63</i>    | Immink et al. (2009) <sup>T</sup>                                      |
| <i>ABS-2 AGL78</i>    | Immink et al. (2009) <sup>T</sup>                                      |
| <i>ABS-2 AGL92</i>    | de Folter et al. (2005); Immink et al. (2009) <sup>T</sup>             |
| <i>ABS-2 AGL97</i>    | de Folter et al. (2005)                                                |
| <i>SEP4-2 AP1</i>     | de Folter et al. (2005); Immink et al. (2009) <sup>T</sup>             |
| <i>SEP4-2 FUL</i>     | de Folter et al. (2005); Immink et al. (2009) <sup>T</sup>             |
| <i>SEP4-2 SOC1</i>    | de Folter et al. (2005); Immink et al. (2009) <sup>T</sup>             |
| <i>SEP4-2 SVP</i>     | Immink et al. (2009) <sup>T</sup>                                      |
| <i>SEP4-2 AGL66</i>   | de Folter et al. (2005)                                                |
| <i>SEP4-2 AGL86</i>   | de Folter et al. (2005)                                                |
| <i>SEP4-2 AGL92</i>   | de Folter et al. (2005)                                                |
| <i>SEP4-2 AGL97</i>   | de Folter et al. (2005)                                                |
| <i>AGL74-2 AGL49</i>  | de Folter et al. (2005)                                                |
| <i>AGL74-2 AGL52</i>  | de Folter et al. (2005)                                                |
| <i>AGL74-2 AGL78</i>  | de Folter et al. (2005); Immink et al. (2009) <sup>T</sup>             |
| <i>AGL74-2 AGL79</i>  | Immink et al. (2009) <sup>T</sup>                                      |
| <i>AGL74-2 AGL84</i>  | Immink et al. (2009) <sup>T</sup>                                      |
| <i>AGL74-2 AGL101</i> | Immink et al. (2009) <sup>T</sup>                                      |

Table S1 – continued from previous page

| Interaction           | References                                                 |
|-----------------------|------------------------------------------------------------|
| <i>AGL74-2 AGL103</i> | de Folter et al. (2005); Immink et al. (2009) <sup>T</sup> |
| <i>AGL74-N AG</i>     | de Folter et al. (2005)                                    |
| <i>AGL74-N SHP1</i>   | de Folter et al. (2005)                                    |
| <i>AGL74-N SEP4</i>   | de Folter et al. (2005)                                    |
| <i>AGL74-N SHP2</i>   | de Folter et al. (2005)                                    |
| <i>AGL74-N AGL6</i>   | de Folter et al. (2005)                                    |
| <i>AGL74-N AP1</i>    | de Folter et al. (2005)                                    |
| <i>AGL74-N CAL</i>    | de Folter et al. (2005)                                    |
| <i>AGL74-N STK</i>    | de Folter et al. (2005)                                    |
| <i>AGL74-N AGL12</i>  | de Folter et al. (2005)                                    |
| <i>AGL74-N AGL13</i>  | de Folter et al. (2005)                                    |
| <i>AGL74-N AGL17</i>  | de Folter et al. (2005)                                    |
| <i>AGL74-N AGL26</i>  | de Folter et al. (2005)                                    |
| <i>AGL74-N FLM</i>    | de Folter et al. (2005)                                    |
| <i>AGL74-N ABS</i>    | de Folter et al. (2005); Immink et al. (2009) <sup>T</sup> |
| <i>AGL74-N AGL42</i>  | de Folter et al. (2005)                                    |
| <i>AGL74-N AGL43</i>  | de Folter et al. (2005)                                    |
| <i>AGL74-N AGL49</i>  | de Folter et al. (2005)                                    |
| <i>AGL74-N AGL52</i>  | de Folter et al. (2005)                                    |
| <i>AGL74-N AGL55</i>  | de Folter et al. (2005)                                    |
| <i>AGL74-N AGL56</i>  | de Folter et al. (2005)                                    |
| <i>AGL74-N AGL65</i>  | de Folter et al. (2005); Immink et al. (2009) <sup>T</sup> |
| <i>AGL74-N AGL71</i>  | de Folter et al. (2005)                                    |
| <i>AGL74-N AGL72</i>  | de Folter et al. (2005)                                    |
| <i>AGL74-N AGL77</i>  | de Folter et al. (2005)                                    |
| <i>AGL74-N AGL78</i>  | de Folter et al. (2005)                                    |
| <i>AGL74-N AGL79</i>  | Immink et al. (2009) <sup>D</sup>                          |
| <i>AGL74-N AGL82</i>  | de Folter et al. (2005)                                    |
| <i>AGL74-N AGL87</i>  | de Folter et al. (2005)                                    |
| <i>AGL74-N AGL90</i>  | de Folter et al. (2005)                                    |
| <i>AGL74-N AGL96</i>  | de Folter et al. (2005)                                    |
| <i>AGL74-N AGL101</i> | de Folter et al. (2005)                                    |
| <i>AGL74-N AGL102</i> | Immink et al. (2009) <sup>D</sup>                          |
| <i>AGL74-N AGL103</i> | de Folter et al. (2005)                                    |
| <i>AGL74-N ABS-2</i>  | de Folter et al. (2005)                                    |
| <i>AGL74-N SEP4-2</i> | de Folter et al. (2005)                                    |



**Table S2: Abundance of frequent subgraphs in a network of MADS domain proteins.** This network includes exclusively interactions reported in a large-scale yeast two hybrid study (de Folter et al., 2005). Subgraph counts are compared to those of  $10^4$  randomized networks with the same degree distribution.

| Subgraph                                                                            | $N_{MADS}$ | Randomized networks |        |           |            | $p$ -value  |
|-------------------------------------------------------------------------------------|------------|---------------------|--------|-----------|------------|-------------|
|                                                                                     |            | Mean                | Median | Std. dev. | Std. error |             |
| 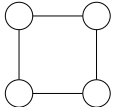   | 778        | 77.64               | 67     | 50.93     | 0.51       | $< 10^{-4}$ |
|   | 79         | 22.95               | 22     | 9.23      | 0.09       | $< 10^{-4}$ |
|  | 8331       | 1733.73             | 1491   | 1080.05   | 10.8       | 0.0001      |
|  | 52         | 12.95               | 12     | 8.9       | 0.09       | 0.0002      |
|  | 253        | 108.31              | 108    | 41.73     | 0.42       | 0.0009      |

**Table S3: Abundance of connection patterns in a network of MADS domain proteins.** This network includes exclusively interactions reported in a large-scale yeast two hybrid study (de Folter et al., 2005). Table shows results for connection patterns that forcefully include some interactions (solid line) but may or not contain other interactions (dashed lines).

| Embedded subgraph                                                                   | $N_{MADS}$ | Randomized networks |        |           |            | $p$ -value  |
|-------------------------------------------------------------------------------------|------------|---------------------|--------|-----------|------------|-------------|
|                                                                                     |            | Mean                | Median | Std. dev. | Std. error |             |
| 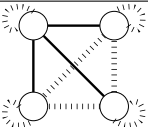   | 15032      | 14328.8             | 14278  | 506.41    | 5.06       | 0.095       |
|   | 14983      | 17697.6             | 17693  | 482.23    | 4.82       | 1           |
|  | 4348       | 5470.25             | 5470   | 365.436   | 3.65       | 0.999       |
|  | 219        | 374.656             | 319    | 274.48    | 2.74       | 0.659       |
|  | 2126       | 1281.48             | 1280   | 92.39     | 0.92       | $< 10^{-4}$ |

**Table S4: Experimentally validated functional tetramers**

| Tetramer                   | Evidence                  | Status        | Reference                                                           |
|----------------------------|---------------------------|---------------|---------------------------------------------------------------------|
| AP3-PI-SEP3-API            | Genetics and biochemistry | Confirmed     | Homma and Goto (2001); Pelaz et al. (2001); Smaczniak et al. (2012) |
| AP3-PI-SEP3-AG             | Genetics and biochemistry | Confirmed     | Homma and Goto (2001); Smaczniak et al. (2012)                      |
| SEP3-AG-SEP3-AG            | Biochemistry              | Confirmed     | Smaczniak et al. (2012)                                             |
| SEP3-SEP3-AP3-PI           | Biochemistry              | Confirmed     | Smaczniak et al. (2012)                                             |
| SEP3-API-SEP3-API          | Biochemistry              | Confirmed     | Smaczniak et al. (2012)                                             |
| AG-SEP3-STK-SEP3           | Genetics and biochemistry | Highly likely | Favaro et al. (2003)                                                |
| AG-SEP3-SHP1-SEP3          | Genetics and biochemistry | Highly likely | Favaro et al. (2003)                                                |
| AG-SEP3-SHP2-SEP3          | Genetics and biochemistry | Highly likely | Favaro et al. (2003)                                                |
| STK-SEP3-STK-SEP3          | Genetics and biochemistry | Highly likely | Favaro et al. (2003)                                                |
| SHP1-SEP3-SHP2-SEP3        | Genetics and biochemistry | Highly likely | Favaro et al. (2003)                                                |
| STK-SEP3-ABS-SEP3          | Genetics and biochemistry | Highly likely | de Folter et al. (2006); Mizzotti et al. (2012)                     |
| AG-SEP3-ABS-SEP3           | Genetics and biochemistry | Highly likely | de Folter et al. (2006); Mizzotti et al. (2012)                     |
| ABS-SEP3-SHP1-SEP3         | Genetics and biochemistry | Highly likely | de Folter et al. (2006); Mizzotti et al. (2012)                     |
| ABS-SEP3-SHP2-SEP3         | Genetics and biochemistry | Highly likely | de Folter et al. (2006); Mizzotti et al. (2012)                     |
| AGL30-AGL65-AGL66-AGL104 † | Genetics and biochemistry | Highly likely | Verelst et al. (2007a,b)                                            |
| API-AGL24-SVP-CAL          | Genetics and biochemistry | Highly likely | (Gregis et al., 2008)                                               |

† This tetramer could not be searched in the list of prospective tetramers because in the data set that we used AGL30 has no interactions. However, it is noteworthy that the interactions that Verelst et al. (2007a,b) report are fully compatible with a tetramer-like subgraph.

## References

- de Folter, S., Immink, R., Kieffer, M., Parenicová, L., Henz, S., Weigel, D., Busscher, M., Kooiker, M., Colombo, L., Kater, M., Davies, B., and Angenent, G. (2005). Comprehensive interaction map of the Arabidopsis MADS box transcription factors. *Plant Cell*, 17:1424–1433.
- de Folter, S., Shchennikova, A. V., Franken, J., Busscher, M., Baskar, R., Grossniklaus, U., Angenent, G. C., and Immink, R. G. H. (2006). A Bsister MADS-box gene involved in ovule and seed development in petunia and Arabidopsis. *Plant J.*, 47(6):934–946.
- Fan, H. Y., Hu, Y., Tudor, M., and Ma, H. (1997). Specific interactions between the K domains of AG and AGLs, members of the MADS domain family of DNA binding proteins. *Plant J.*, 12(5):999–1010.
- Favaro, R., Pinyopich, A., Battaglia, R., Kooiker, M., Borghi, L., Ditta, G., Yanofsky, M. F., Kater, M. M., and Colombo, L. (2003). MADS-box protein complexes control carpel and ovule development in Arabidopsis. *Plant Cell*, 15(11):2603–2611.
- Gregis, V., Sessa, A., Colombo, L., and Kater, M. M. (2008). AGAMOUS-LIKE24 and SHORT VEGETATIVE PHASE determine floral meristem identity in Arabidopsis. *Plant J.*, 56(6):891–902.
- Honma, T. and Goto, K. (2001). Complexes of MADS-box proteins are sufficient to convert leaves into floral organs. *Nature*, 409:525–529.
- Immink, R. G., Tonaco, I. A., de Folter, S., Shchennikova, A., van Dijk, A. D., Busscher-Lange, J., Borst, J. W., and Angenent, G. C. (2009). SEPALLATA3: The ‘glue’ for MADS box transcription factor complex formation. *Genome Biol.*, 10:R24.
- Melzer, R., Verelst, W., and Theißen, G. (2009). The class E floral homeotic protein SEPALLATA3 is sufficient to loop DNA in ‘floral quartet’-like complexes in vitro. *Nucleic Acids Res.*, 37(1):144–157.
- Mizzotti, C., Mendes, M. A., Caporali, E., Schnittger, A., Kater, M. M., Battaglia, R., and Colombo, L. (2012). The MADS box genes SEEDSTICK and ARABIDOPSIS Bsister play a maternal role in fertilization and seed development. *Plant J.*, 70(3):409–420.
- Pelaz, S., Tapia-López, R., Alvarez-Buylla, E. R., and Yanofsky, M. F. (2001). Conversion of leaves into petals in Arabidopsis. *Curr. Biol.*, 11:182–184.
- Smaczniak, C., Immink, R. G. H., Muiño, J. M., Blanvillain, R., Busscher, M., Busscher-Lange, J., Dinh, Q. D. P., Liu, S., Westphal, A. H., Boeren, S., Parcy, F., Xu, L., Carles, C. C., Angenent, G. C., and Kaufmann, K. (2012). Characterization of MADS-domain transcription factor complexes in Arabidopsis flower development. *Proc. Natl. Acad. Sci. USA*, 109(5):1560–1565.
- Verelst, W., Saedler, H., and Münster, T. (2007a). MIKC\* MADS-protein complexes bind motifs enriched in the proximal region of late pollen-specific Arabidopsis promoters. *Plant Physiol.*, 143(1):447–460.
- Verelst, W., Twell, D., de Folter, S., Immink, R., Saedler, H., and Münster, T. (2007b). MADS-complexes regulate transcriptome dynamics during pollen maturation. *Genome Biol.*, 8(11):R249.
